# Supplementary material
Source: bioRxiv or medRxiv preprint supplement (https://medrxiv.org/highwire/filestream/97106/field_highwire_adjunct_files/3/2020.09.15.20192765-4.pdf)
Supplement: Supplementary file [file 2020.09.15.20192765-4.pdf]

Supplemental Figure 4

A

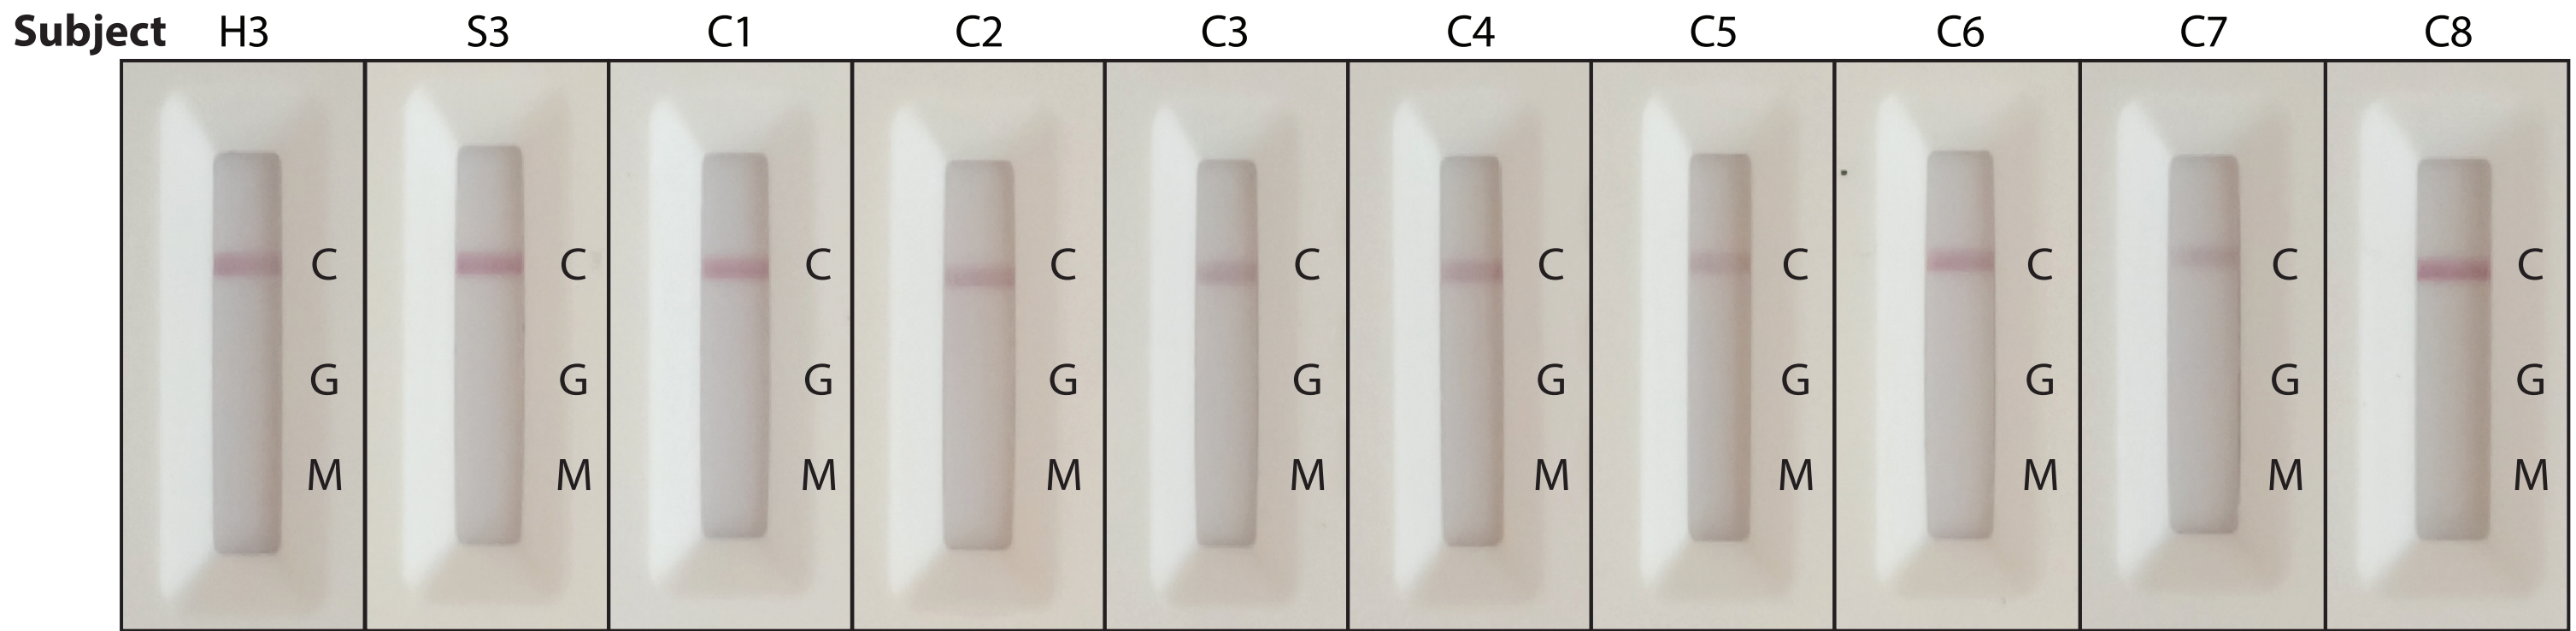

B

Operator ID: CD  
System serial number: 40676

**Results List Report**  
Released

| C / P | Module | SID | Name | Assay     | Result                 | Flags | Code | Date / Time         |
|-------|--------|-----|------|-----------|------------------------|-------|------|---------------------|
| LAS   | 1      | 26  | C-08 | COV-2 IgG | 0.01 Index<br>Negative |       |      | 06.25.2020<br>11:18 |
| LAS   | 1      | 49  | C-07 | COV-2 IgG | 0.03 Index<br>Negative |       |      | 06.25.2020<br>11:17 |
| LAS   | 1      | 47  | C-06 | COV-2 IgG | 0.02 Index<br>Negative |       |      | 06.25.2020<br>11:17 |
| LAS   | 1      | 21  | C-05 | COV-2 IgG | 0.02 Index<br>Negative |       |      | 06.25.2020<br>11:16 |
| LAS   | 1      | 20  | C-04 | COV-2 IgG | 0.03 Index<br>Negative |       |      | 06.25.2020<br>11:15 |
| LAS   | 1      | 19  | C-03 | COV-2 IgG | 0.24 Index<br>Negative |       |      | 06.25.2020<br>11:15 |
| LAS   | 1      | 18  | C-02 | COV-2 IgG | 0.01 Index<br>Negative |       |      | 06.25.2020<br>11:15 |
| LAS   | 1      | 17  | C-01 | COV-2 IgG | 0.01 Index<br>Negative |       |      | 06.25.2020<br>11:14 |
| LAS   | 1      | 16  | B-04 | COV-2 IgG | 6.07 Index<br>Positive |       |      | 06.25.2020<br>11:14 |
| LAS   | 1      | 15  | B-03 | COV-2 IgG | 6.23 Index<br>Positive |       |      | 06.25.2020<br>11:14 |
| LAS   | 1      | 11  | B-02 | COV-2 IgG | 2.66 Index<br>Positive |       |      | 06.25.2020<br>11:13 |
| LAS   | 1      | 10  | B-01 | COV-2 IgG | 4.07 Index<br>Positive |       |      | 06.25.2020<br>11:13 |
